# Supplementary material for: Structure of SALL4 zinc finger domain reveals link between AT-rich DNA binding and Okihiro syndrome
Source: PubMed Central journal article supplement (PMC9838217; doi:10.26508/lsa.202201588), 2023-01-12

Figure 3 EMSA replicate 1

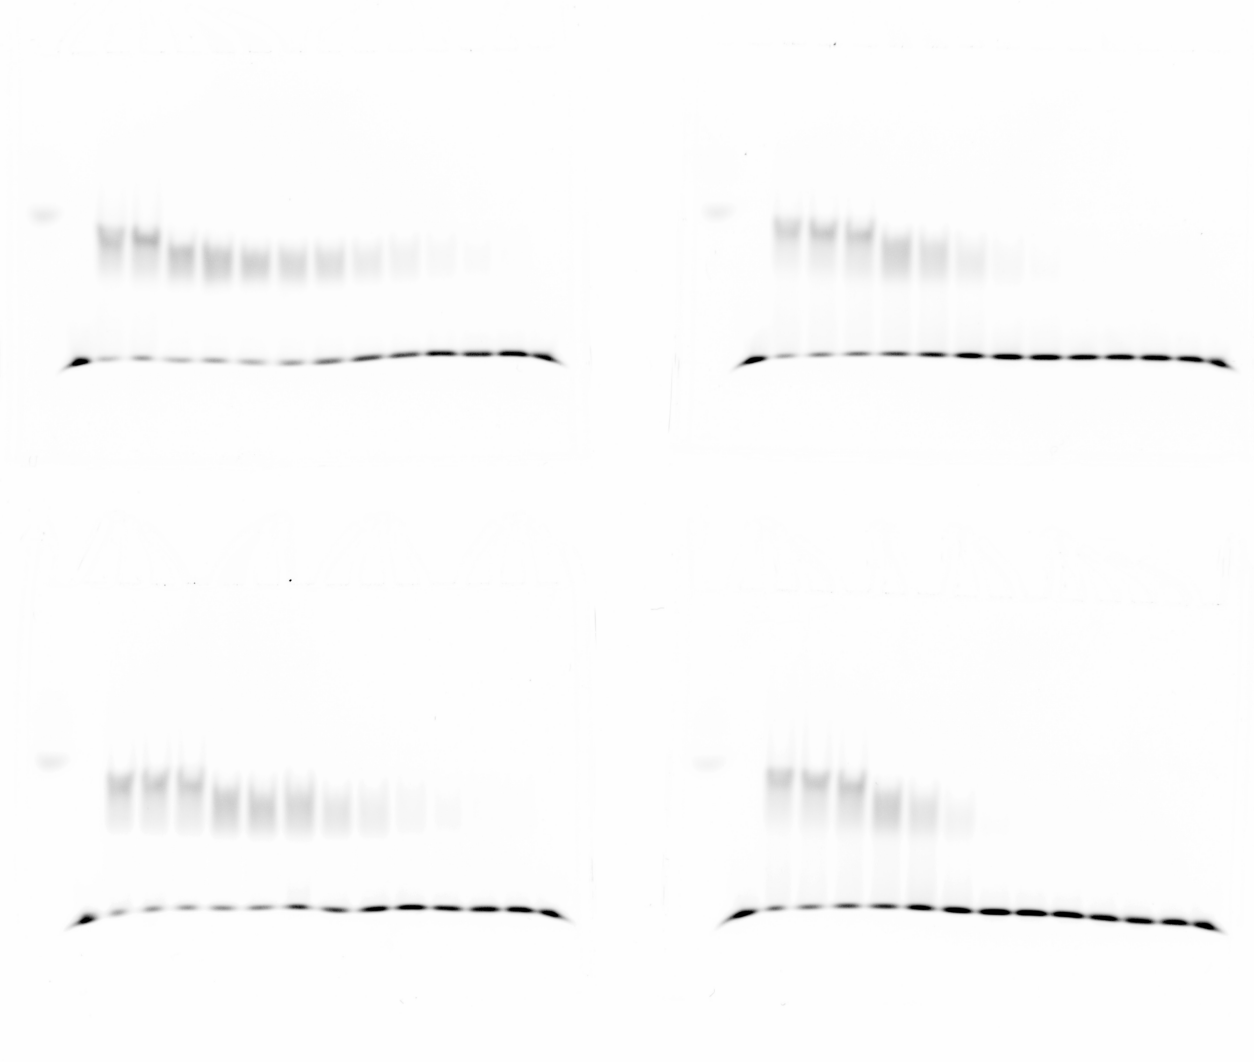

Figure 3 EMSA replicate 2

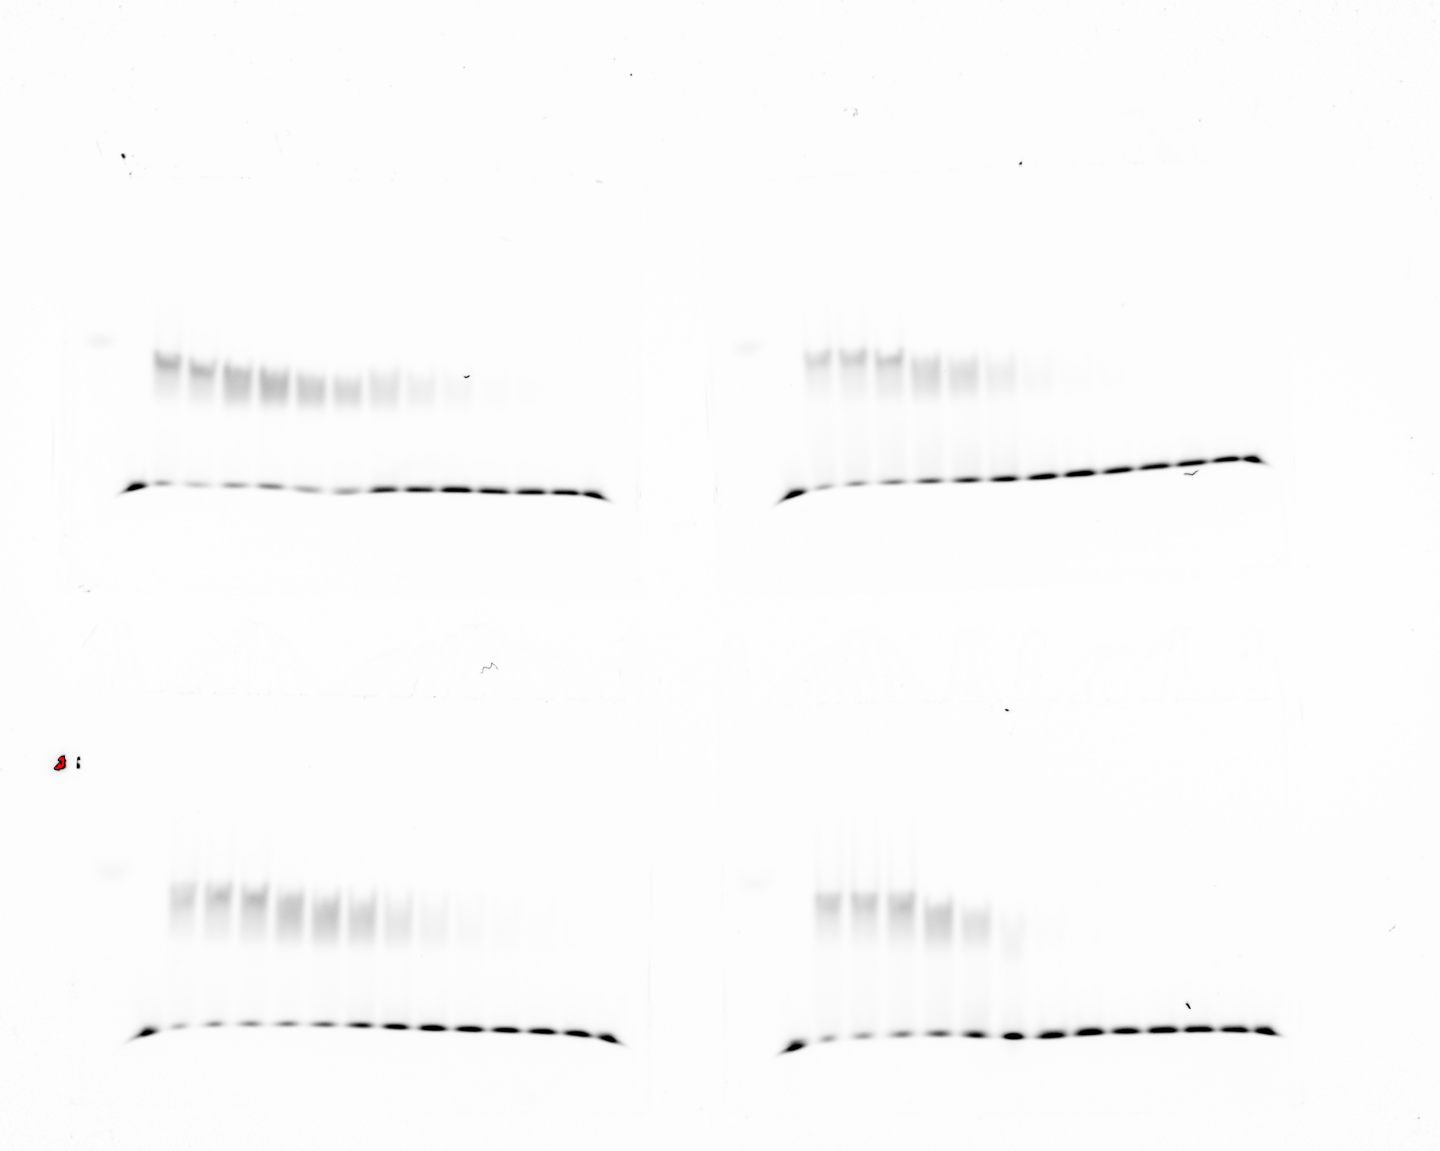

Figure 3 EMSA replicate 3

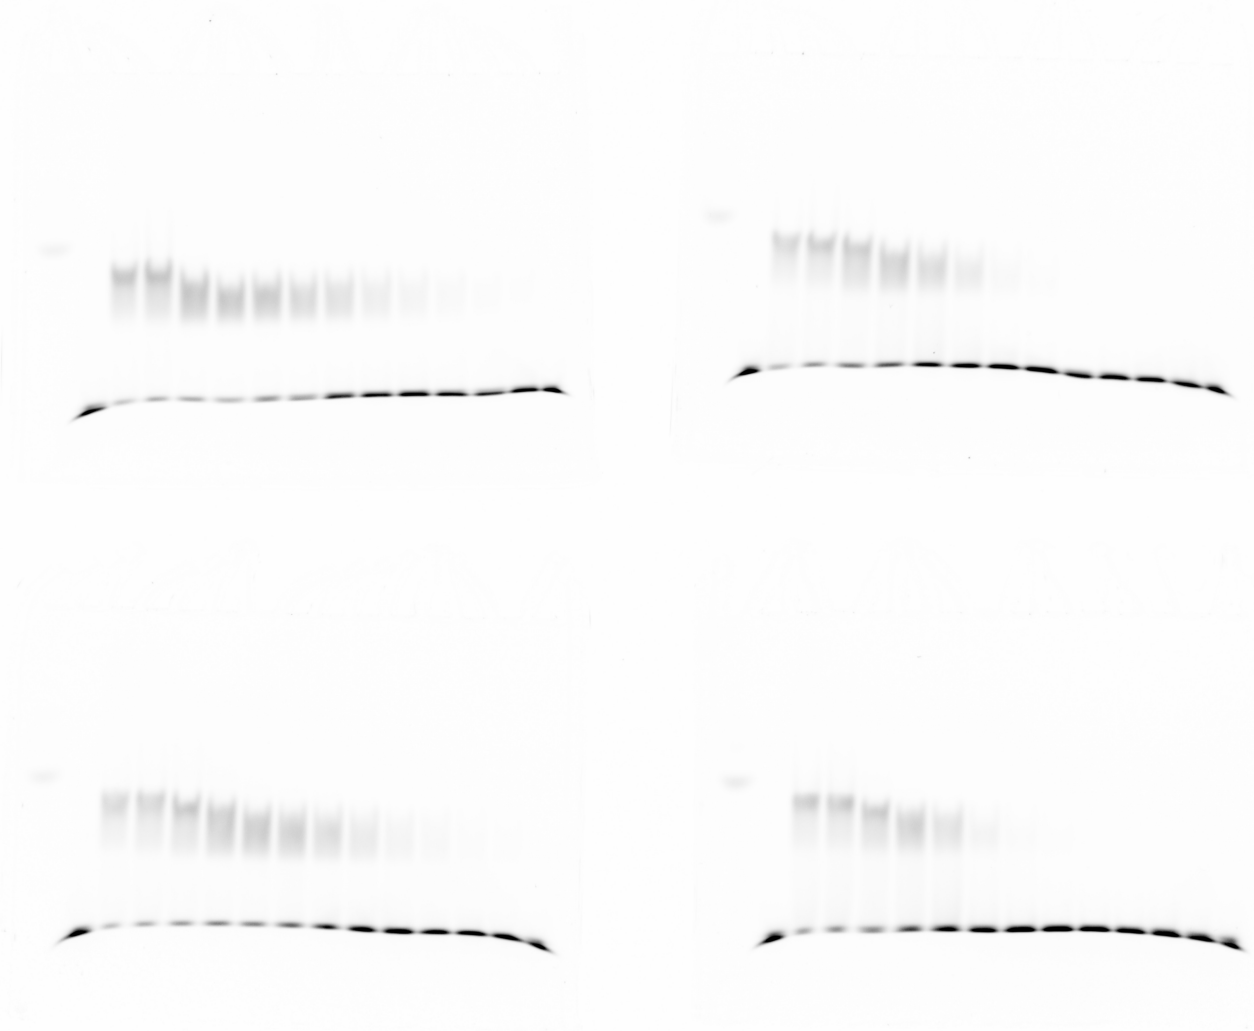

Figure 4 EMSA replicate 1

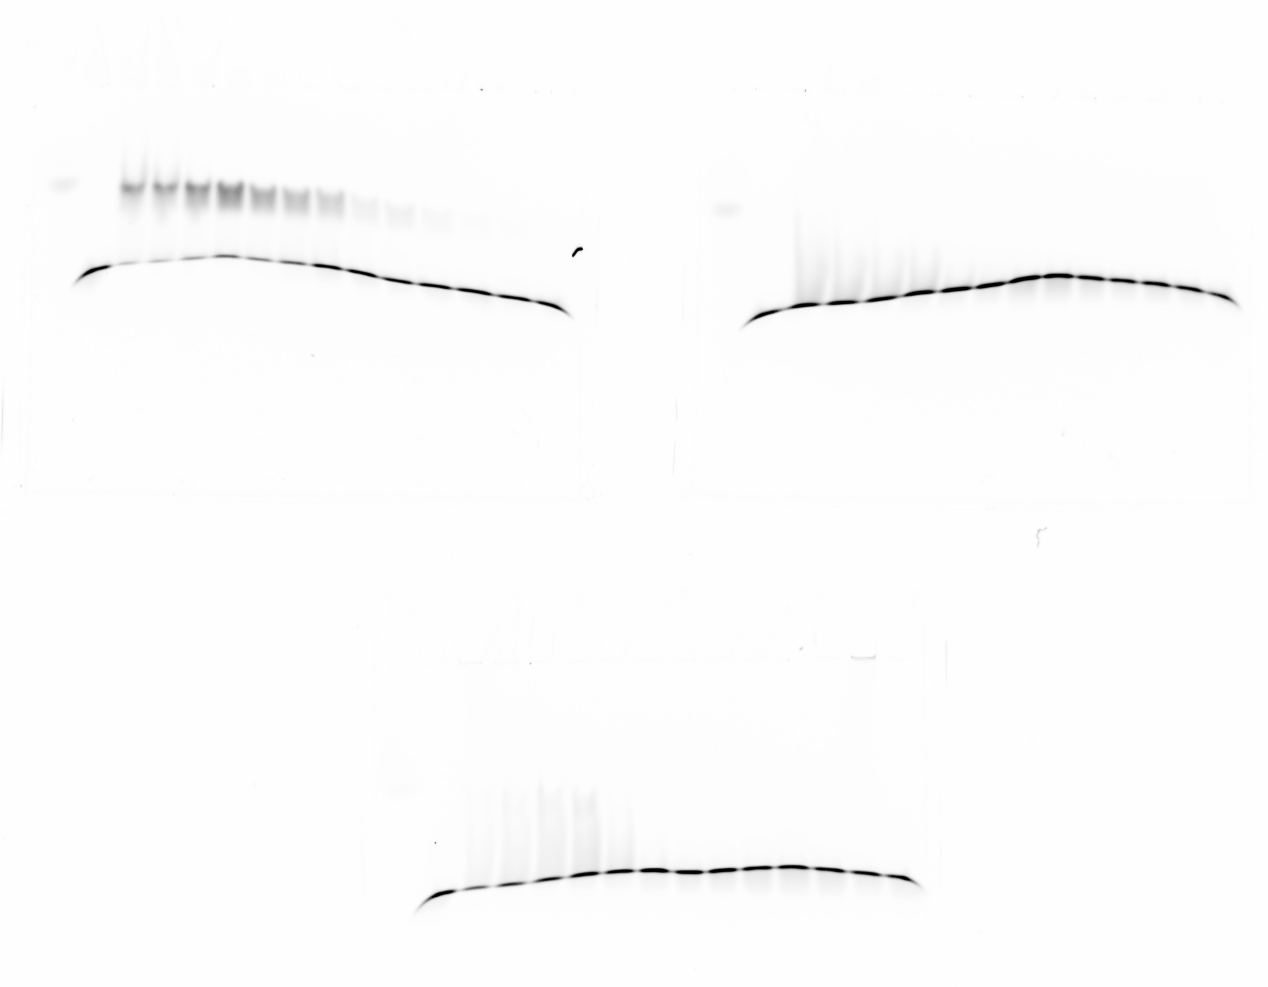

Figure 4 EMSA replicate 2

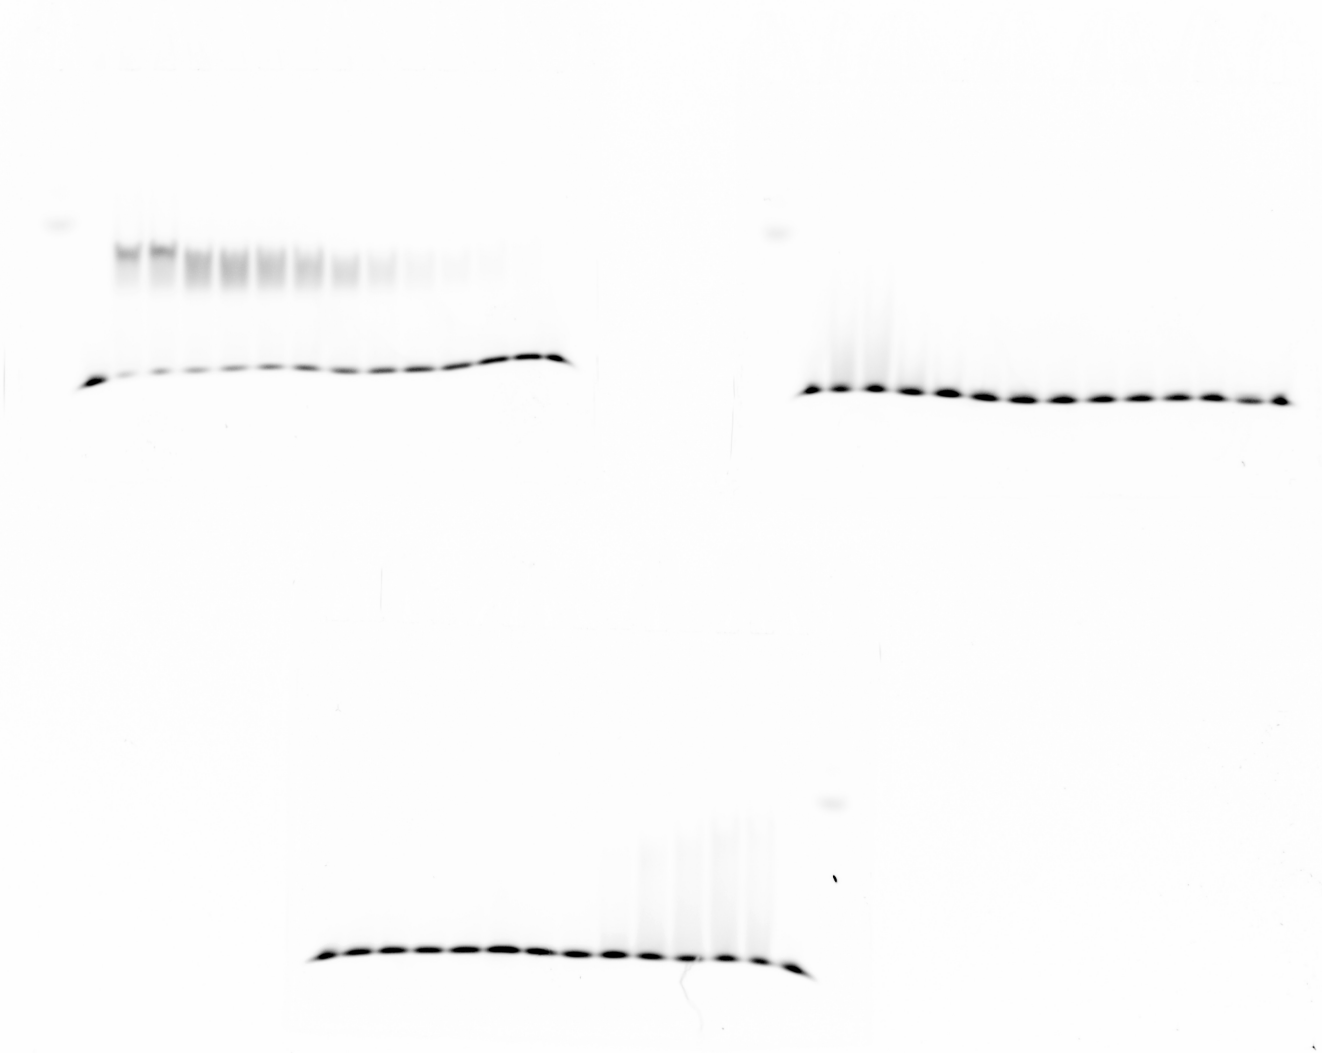

Figure 4 EMSA replicate 3

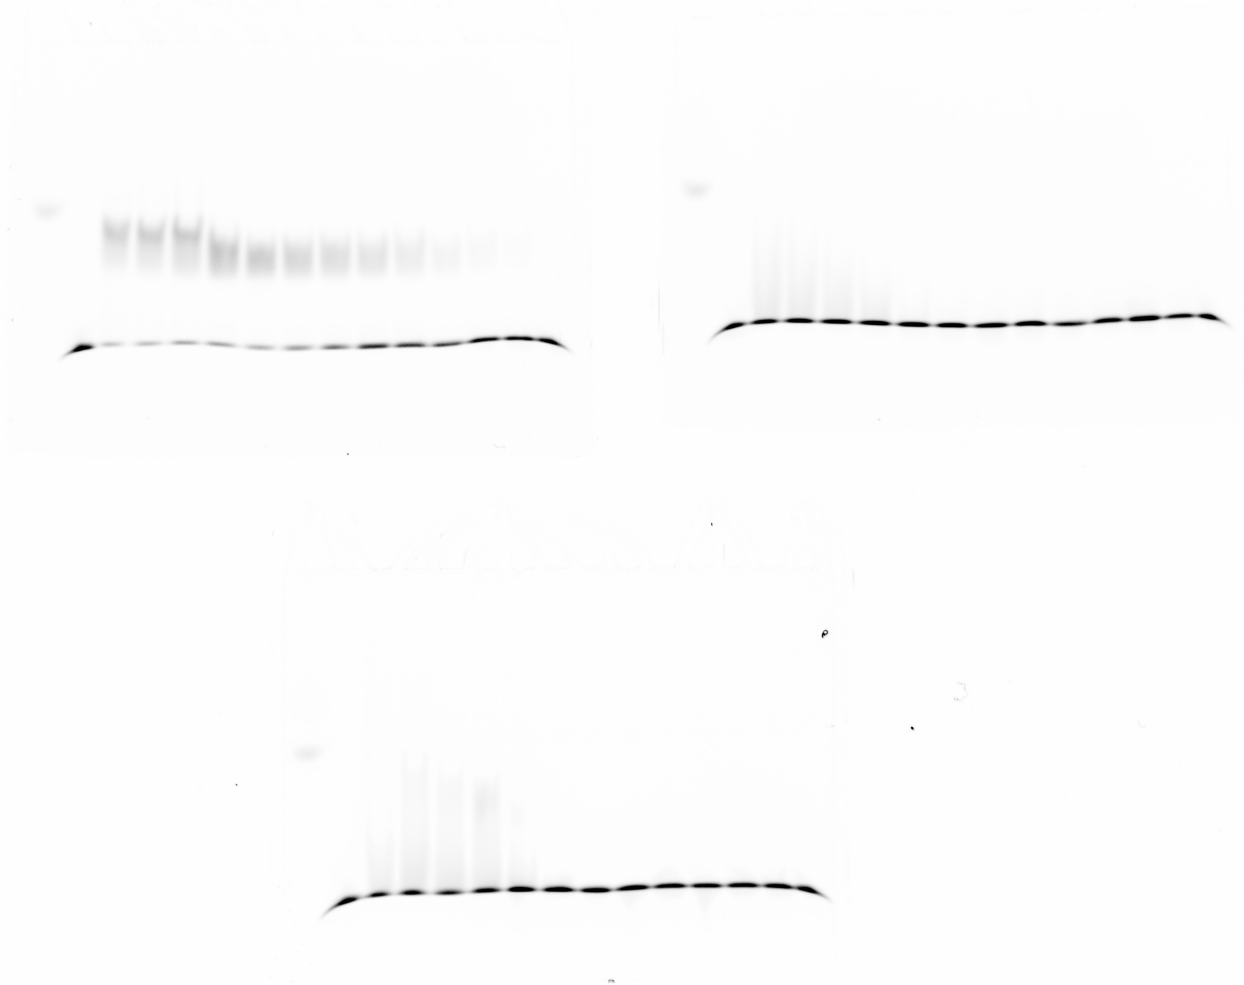

# Coomassie gel of purified proteins

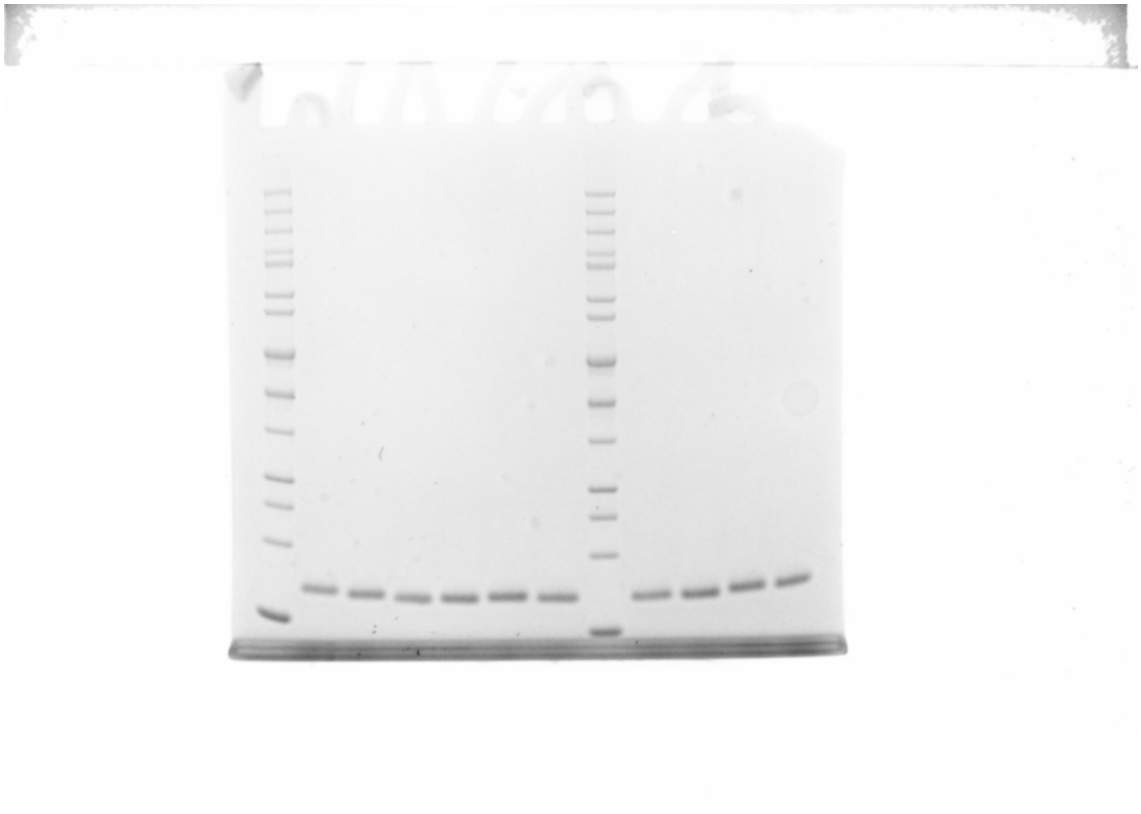

Supplement: LSA-2022-01588_SdataF3.3_F4.3.pdf [file LSA-2022-01588_SdataF3.3_F4.3.pdf]
